Giraffe coat patterns

D. E. Lee *et al.*

1 **Seeing spots: Quantifying mother-offspring similarity and assessing fitness**

2 **consequences of coat pattern traits in a wild population of giraffes (*Giraffa***

3 ***camelopardalis*)**

4 Derek E. Lee,<sup>1,2,\*</sup> Douglas R. Cavener,<sup>2</sup> and Monica L. Bond<sup>1,3</sup>

5 <sup>1</sup> Wild Nature Institute, Concord, New Hampshire, USA

6 <sup>2</sup> Department of Biology, Pennsylvania State University, University Park, Pennsylvania, USA

7 <sup>3</sup> Department of Evolutionary Biology and Environmental Studies, University of Zürich,

8 Zürich, Switzerland

9 \* *Correspondent: derek@wildnatureinstitute.org*

10

11 RH: Giraffe coat patterns

12

13 **Abstract**

14 Polymorphic phenotypes of mammalian coat coloration have been important to the study of  
15 genetics and evolution, but less is known about the inheritance and fitness consequences of  
16 individual variation in complex coat pattern traits such as spots and stripes. Giraffe coat  
17 markings are highly complex and variable and it has been hypothesized that variation in coat  
18 patterns most likely affects fitness by camouflaging neonates against visually hunting  
19 predators. We quantified complex coat pattern traits of wild Masai giraffes using image  
20 analysis software, determined the similarity of spot pattern traits between mother and  
21 offspring, and assessed whether variation in spot pattern traits was related to fitness as  
22 measured by juvenile survival. The methods we described could comprise a framework for  
23 objective quantification of complex mammal coat pattern traits based on photographic coat  
24 pattern data. We demonstrated that some characteristics of giraffe coat spot shape were likely  
25 to be heritable, as measured by mother-offspring regression. We found significant variation in  
26 juvenile survival among phenotypic groups of neonates defined by multivariate clustering  
27 based on spot trait measurement variables. We also found significant variation in neonatal  
28 survival associated with spot size and shape covariates. Spot trait variation also may be  
29 relevant to other components of fitness, such as adult survival or fecundity. These findings  
30 will inform investigations into developmental and genetic architecture of complex mammal  
31 coat patterns and their adaptive value.

32 **Introduction**

33 Complex color patterns such as spots and stripes are found on many animal species and these  
34 phenotypic traits are hypothesized to play adaptive roles in predator and parasite evasion,  
35 thermoregulation, and communication (Cott, 1940; Caro, 2005). Many foundational studies  
36 of coloration using starkly different color morphs from diverse taxa such as insects  
37 (Kettlewell, 1955; Wittkopp *et al.*, 2003), mice (Morse, 1978; Russell, 1985; Bennett &

38 Lamoreux, 2003), reptiles (Rosenblum *et al.*, 2004; Calsbeek *et al.*, 2008), fish (Endler, 1983;  
39 Irion *et al.*, 2016), and birds (Roulin, 2004) demonstrated Mendelian inheritance and natural  
40 selection, and discovered genes that cause color morph mutations (Hoekstra, 2006; Protas &  
41 Patel, 2008; San-Jose & Roulin, 2017). Individual variation in a complex color pattern trait of  
42 spot size was also part of the earliest work on genetics and inheritance (Wright, 1917).  
43 Measuring individual variation in complex color patterns, especially detailed measurements  
44 such as animal biometrics (Kuhl & Burghardt, 2013), can provide novel insight into  
45 developmental and genetic architecture (Bowen & Dawson, 1977; Klingenburg, 2010; San-  
46 Jose & Roulin, 2017), and the adaptive value of the patterns (Hoekstra, 2006; Allen *et al.*,  
47 2010), as well as benefitting studies of behavior (Lorenz, 1937; Whitehead, 1990), and  
48 population biology (Holmberg *et al.*, 2009; Lee & Bolger, 2017), and the growing field of  
49 phenomics (Houle *et al.*, 2010). Some methods to robustly quantify individuals' continuous  
50 variation in complex color patterns have been developed for general use (Schneider *et al.*,  
51 2012; Van Belleghem *et al.*, 2018) and specific taxa such as fishes (Endler, 1980; Holmberg  
52 *et al.*, 2009), butterflies (LePoul *et al.*, 2014), penguins (Sherley *et al.*, 2010), and primates  
53 (Allen *et al.*, 2015). We see a need for more tools and techniques to reliably quantify  
54 individual variation in complex coat pattern traits in wild populations (Eizirik *et al.*, 2010;  
55 Willisch *et al.*, 2013), and studies that use quantitative genetics and demographic methods to  
56 investigate heritability and adaptive significance of those traits in wild mammal populations  
57 (Kruuk *et al.*, 2008; Kaelin *et al.*, 2012).

58         The coat patterns of Masai giraffes (*Giraffa camelopardalis tippelskirchii*) are  
59 complex and show a high degree of individual variation (Dagg, 1968; **Figure 1**). Masai  
60 giraffes spots vary in color and shape from those that are nearly round with very smooth  
61 edges (low tortuousness), to extremely elliptical with incised or lobate edges (high  
62 tortuousness). Giraffe skin pigmentation is uniformly dark grey (Dimond & Montagna,

63 1976), but the spots that make up their coat markings are highly variable in traits such as  
64 color, roundness, and perimeter tortuousness. This variation has been used to classify  
65 subspecies (Lydekker, 1904), and to reliably identify individuals because patterns do not  
66 change with age (Foster, 1966; Bolger *et al.*, 2012; Dagg, 2014). Dagg (1968) first presented  
67 evidence from a small zoo population that the shape, number, area, and color of spots in  
68 giraffe coat patterns may be heritable, but analysis of spot traits in wild giraffes, and  
69 objective measurements of spot characteristics in general have been lacking.

70 It has been hypothesized that giraffe coat patterns evolved to camouflage neonates  
71 whose primary defense against predation is concealment (Langman, 1977; Mitchell &  
72 Skinner, 2003); thus the most likely fitness effects from variation in coat patterns should be  
73 variation in juvenile survival. Giraffe calves spend much of their time, day and night, hiding  
74 in the dappled light of trees and bushes and their ability to match this background should  
75 influence detection by visually hunting predators such as lions and hyenas (Endler, 1978;  
76 Merilaita *et al.*, 2017). Background matching, the adaptation of an animal's coloration to  
77 mimic its average background and reduce detection by visually hunting predators, is a  
78 common form of camouflage (Endler, 1978; Merilaita *et al.*, 2017). Alternative hypotheses  
79 about the adaptive value of giraffe coat markings include thermoregulation (Skinner &  
80 Smithers, 1990), and in this social species with good visual sensory perception (Dagg, 2014;  
81 VanderWaal *et al.*, 2014), markings could also facilitate individual recognition (Tibbetts &  
82 Dale, 2007) and kin recognition (Beecher, 1982; Tang-Martinez, 2001).

83 Our purpose in this study was to: 1) demonstrate the use of public domain image  
84 analysis software ImageJ (Schneider *et al.*, 2012) to extract patterns from image data and  
85 quantify multiple aspects of the complex coat patterns of wild Masai giraffes; 2) use  
86 quantitative genetics methods (parent-offspring regression) to quantify the proportion of  
87 observed phenotypic variation of a trait that is shared between mother and offspring; and 3)

88 determine whether variation in complex coat pattern traits was related to a measure of fitness  
89 (survival) and thereby infer the effect of natural selection (viability selection) on giraffe coat  
90 patterns (Lande & Arnold, 1983; Falconer & Mackay, 1996).

## 91 **Materials & Methods**

92 As a general overview, our methods were to: 1) collect field data in one area of Tanzania as  
93 digital images of giraffes to be used for spot pattern and survival analyses; 2) extract patterns  
94 from images; 3) quantify giraffe patterns by measuring 11 spot traits; 4) use principal  
95 components analysis (PCA) to reduce the dimensionality of the spot traits; 5) use mother-  
96 offspring regressions to estimate the phenotypic similarity between mother and offspring of  
97 the 11 spot traits and the 1st two dimensions of the PCA; 6) use k-means clustering to assign  
98 giraffe calves into 4 phenotypic groups according to their spot pattern traits; 7) use capture-  
99 mark-recapture analysis to estimate survival and determine whether there are fitness  
100 differences among the phenotypic groups; 8) use capture-mark-recapture analysis to  
101 determine whether there are fitness effects from any particular spot traits.

## 102 **Field Data Collection**

103 This study used data from individually identified, wild, free-ranging Masai giraffes in a 1700  
104 km<sup>2</sup> sampled area within a 4400 km<sup>2</sup> region of the Tarangire Ecosystem, northern Tanzania,  
105 East Africa. Data were collected as previously described in Lee *et al.* (2016a). We collected  
106 data during systematic road transect sampling for photographic capture-mark-recapture  
107 (PCMR). We conducted 26 daytime surveys for giraffe PCMR data between January 2012  
108 and February 2016. We sampled giraffes three times per year around 1 February, 1 June, and  
109 1 October near the end of every precipitation season (short rains, long rains, and dry,  
110 respectively) by driving a network of fixed-route transects on single-lane dirt tracks in the  
111 study area. We surveyed according to Pollock's robust design sampling framework (Pollock,  
112 1982; Kendall *et al.*, 1995), with three occasions per year. Each sampling occasion was

113 composed of two sampling events during which we surveyed all transects in the study area  
114 with only a few days interval between events. Each sampling occasion was separated by a 4-  
115 month interval ( $4.3 \text{ years} \times 3 \text{ occasions year}^{-1} \times 2 \text{ events occasion}^{-1} = 26 \text{ survey events}$ ).

116 During PCMR sampling events, a sample of individuals were encountered and either  
117 ‘sighted’ or ‘resighted’ by slowly approaching and photographing the animal’s right side at a  
118 perpendicular angle (Canon 40D and Rebel T2i cameras with Canon Ultrasonic IS 100 – 400  
119 mm lens, Canon U.S.A., Inc., One Canon Park, Melville, New York, 11747, USA). We  
120 identified individual giraffes using their unique and unchanging coat patterns (Foster, 1966;  
121 Dagg, 2014) with the aid of pattern-recognition software Wild-ID (Bolger *et al.*, 2012). We  
122 attempted to photograph every giraffe encountered, and recorded sex and age class based on  
123 physical characteristics. We assigned giraffes to one of four age classes for each observation  
124 based on the species’ life history characteristics and our sampling design: neonate calf (0 – 3  
125 months old), older calf (4 – 11 months old), subadult (1 – 3 years old for females, 1 – 6 years  
126 old for males), or adult (> 3 years for females, > 6 years for males) using a suite of physical  
127 characteristics (Strauss *et al.*, 2015), and size measured with photogrammetry (Lee *et al.*,  
128 2016a). In this analysis, we used only adult females and animals first sighted as neonate  
129 calves.

130 All animal work was conducted according to relevant national and international  
131 guidelines. This research was carried out with permission from the Tanzania Commission for  
132 Science and Technology (COSTECH) Research Permit numbers 2017-163-ER-90-172, 2016-  
133 146-ER-2001-31, 2015-22-ER-90-172, 2014-53-ER-90-172, 2013-103-ER-90-172, 2012-  
134 175-ER-90-172, 2011-106-NA-90-172, Tanzania National Parks (TANAPA), the Tanzania  
135 Wildlife Research Institute (TAWIRI). No Institutional Animal Care and Use Committee  
136 (IACUC) approval was necessary because animal subjects were observed without disturbance  
137 or physical contact of any kind.

138 **Quantification of Spot Patterns**

139 We extracted patterns and analysed spot traits of each animal within the shoulder and rib area  
140 by cropping all images to an analysis rectangle that fit horizontally between the anterior edge  
141 of the rear leg and the chest, and vertically between the back and where the skin folded  
142 beneath the posterior edge of the foreleg (**Figure 1**). For color trait analysis, we used the  
143 Color Histogram procedure of ImageJ (Schneider et al., 2012) on full-color images of the  
144 analysis rectangle. We extracted coat patterns using ImageJ to convert full-color images of  
145 the analysis rectangle to 8-bit greyscale images, then converted to bicolor (black and white)  
146 using the Enhance Contrast and Threshold commands (Schneider et al., 2012). We quantified  
147 10 spot trait measurements of each animal's extracted coat pattern using the Analyze  
148 Particles command in ImageJ (Schneider et al., 2012). To account for differences in image  
149 resolution and animal size (including age-related growth), and to obtain approximately scale-  
150 invariant standard images of each animal, we set the measurement unit of each image equal to  
151 the number of pixels in the height of the analysis rectangle. Therefore all measurements are in  
152 giraffe units (GU), where 1 GU = height of the analysis rectangle (**Figure 1**). We excluded  
153 spots cut off by the edge of the analysis rectangle to avoid the influence of incomplete spots,  
154 and we also excluded spots whose area was  $<0.00001 \text{ GU}^2$  to eliminate the influence of  
155 speckles.

156 We characterized each animal's coat spot pattern traits within the analysis rectangle  
157 using the following 11 metrics available in ImageJ: number of spots; mean spot size (area);  
158 mean spot perimeter; mean angle between the primary axis of an ellipse fit over the spot and  
159 the x-axis of the image; mean circularity ( $4\pi \times [Area] / [Perimeter]^2$  with a value of 1.0  
160 indicating a perfect circle and smaller values indicating an increasingly elongated shape);  
161 mean maximum caliper (the longest distance between any two points along the spot  
162 boundary, also known as Feret diameter); mean Feret angle (the angle [0 to 180 degrees] of

163 the maximum caliper); mean aspect ratio (of the spot's fitted ellipse); mean roundness ( $4 \times$   
164  $[Area]\pi \times [Major\ axis]^2$  or the inverse of aspect ratio); mean solidity ( $[Area] / [Convex\ area]$ ),  
165 also called tortuousness); and mode shade ( $[65536 \times r] + [256 \times g] + [b]$  using RGB values  
166 from color histogram from full color photos).

167 We quantified among-individual variation in spot trait values by reporting the mean,  
168 SD, and coefficient of variation (CV) of each trait. We also quantified the reliability of our  
169 spot pattern trait measurement technique by computing the amount of among-measurement  
170 variation for the same animal made on different photos from different dates using a set of 30  
171 animals with  $>2$  images per animal. We performed a principal components analysis (PCA;  
172 Hotelling, 1933) on the covariance matrix of the 10 spot trait measurements (standardized) to  
173 examine the patterns of variation and covariation among the spot measurement data and to  
174 compute 2 summary dimensions explaining the 10 measurements. We performed k-means  
175 clustering to divide animals into 'coat pattern phenotypes,' phenotypic groups based upon  
176 their spot trait characteristics (MacQueen, 1967). The optimal number of phenotypic groups  
177 was determined by the gap statistic (Tibshirani *et al.*, 2001). We performed all statistical  
178 operations using R (R Core Development Team, 2017).

### 179 **Mother-Offspring Similarity of Spot Traits**

180 The (narrow sense) heritability of a trait (symbolized  $h^2$ ) is the proportion of its total  
181 phenotypic variance that is additive, or available for selection to act upon. Parent-offspring  
182 (PO) regression is one of the traditional quantitative genetics tools used to test for heritable  
183 additive genetic variation (Falconer & Mackay, 1996). PO regression studies cannot  
184 distinguish among phenotypic similarity due to genetic heritability, maternal investment, or  
185 shared environmental effects, it is however one of the few methods available when  
186 information on other kin relations are lacking. Pigmentation traits in mammals are known to  
187 have a strong genetic basis (Bennett and Lamoreux 2003; Hoekstra 2006), supporting the



188 interpretation of PO regression as indicating a genetic component. We expect minimal non-  
189 random variation due to environmental effects because the calves were all born in the same  
190 area with the same vegetation communities during a relatively short time period of average  
191 climate and weather with no spatial segregation by coat pattern phenotype (**Supplementary**  
192 **Material Figure S1**). The animal model was not an improvement because we do not know  
193 fathers, and we had no known siblings in our dataset, therefore PO regression is the most  
194 appropriate tool for our estimates of heritability, with the caveat that there are potentially  
195 environmental and maternal investment effects also present.

196 We identified 31 mother-calf pairs by observing extended suckling behavior. Wild  
197 female giraffes very rarely suckle a calf that is not their own (Pratt and Anderson 1979). We  
198 examined all identification photographs for individuals in known mother-calf pairs, and  
199 selected the best-quality photograph for each animal based on focus, clarity, perpendicularity  
200 to the camera, and unobstructed view of the torso.

201 We predicted spot pattern traits of a calf would be correlated with those of its mother.  
202 We estimated the mother-offspring similarity for each of the 11 spot trait measurements, and  
203 the first dimension generated by the PCA. When we examined the 11 individual spot traits,  
204 we used the Bonferroni adjustment ( $\alpha/\text{number of tests}$ ) to account for multiple tests and set  
205 our adjusted  $\alpha = 0.0045$ . We performed statistical operations in R (R Core Development  
206 Team, 2017).

### 207 **Fitness of Spot Patterns from Juvenile Survival**

208 We assembled encounter histories for 258 calves first observed as neonates for survival  
209 analysis. For each calf we selected the best-quality calf-age (age <6 mo) photograph based on  
210 focus, clarity, perpendicularity to the camera, and unobstructed view of the torso, and ran the  
211 photographs through the ImageJ analysis to quantify each individual's coat spot traits. We  
212 analysed survival using capture-mark-recapture apparent survival models that account for

213 imperfect detectability during surveys (White & Burnham, 1999). No capture-mark-recapture  
214 analyses except ‘known fate’ models can discriminate between mortality and permanent  
215 emigration, therefore when we speak of survival it is technically ‘apparent survival,’ but  
216 during the first seasons of life we expected very few calves to emigrate from the study area,  
217 and if any did emigrate permanently this effect on apparent survival should be random  
218 relative to their spot pattern characteristics.

219 We estimated age-specific seasonal (4-month seasons) survival (up to 3 years old)  
220 according to coat pattern phenotype groups with calves assigned to groups by k-means  
221 clustering of their overall spot traits. We compared 3 models, a null model of no group effect,  
222 age + group, and age  $\times$  group, to examine whether coat pattern phenotypes affected survival  
223 differently at different ages. We also estimated survival as a function of individual covariates  
224 of specific spot traits including linear and quadratic relationships of all 11 spot traits and the  
225 first two PCA dimensions on juvenile survival to examine whether directional, disruptive, or  
226 stabilizing selection was occurring (Lande & Arnold, 1983; Falconer & Mackay, 1996). To  
227 determine at what age specific spot traits had the greatest effect of survival, we examined  
228 survival as a function of spot traits during 3 age periods: the first season of life, first year of  
229 life, and first three years of life.

230 We used Program MARK to analyse complete capture-mark-recapture encounter  
231 histories of giraffes first sighted as neonates (White & Burnham, 1999). We analysed our  
232 encounter histories using Pollock’s Robust Design models to estimate age-specific survival  
233 (Pollock, 1982; Kendall *et al.*, 1995), and ranked models using AICc following Burnham and  
234 Anderson (2002). We used weights (W) and likelihood ratio tests as the metrics for the  
235 strength of evidence supporting a given model as the best description of the data (Burnham &  
236 Anderson, 2002). Due to model selection uncertainty, we present model-averaged parameter  
237 values and based all inferences on these model-averaged values (Burnham & Anderson,

238 2002). We considered factors to be statistically significant if the 85% confidence interval of  
239 the beta coefficient did not include zero (Arnold, 2010), this is a widely accepted convention  
240 for covariates of survival analyses (Arnold, 2010).

241 Based on previous analyses for this population (Lee *et al.*, 2016a, b), we constrained  
242 parameters for survival ( $S$ ) and temporary emigration ( $\gamma_{\square}$  and  $\gamma_{\square}$ ) to be linear functions of  
243 age (symbolized 'A'), and capture and recapture ( $c$  and  $p$ ) were time dependent (symbolized  
244 't'), so the full model was:  $\{(S(A), \gamma_{\square}(A), \gamma_{\square}(A), c(t), p(t))\}$ . Giraffe calf survival does not  
245 vary by sex (Lee *et al.*, 2016b), so we analysed all calves together as an additional constraint  
246 on the number of parameters estimated. We tested goodness-of-fit in encounter history data  
247 using U-CARE (Choquet *et al.*, 2009), and we found some evidence for lack of fit ( $\chi^2_{62} = 97$ ,  
248  $P = 0.01$ ), but because the computed  $\hat{c}$  adjustment was  $< 3$  ( $\hat{c} = 1.5$ ), we felt our models fit  
249 the data adequately and we did not apply a variance inflation factor (Burnham and Anderson  
250 2002; Choquet *et al.*, 2009).

251 We have deposited the primary data underlying these analyses as follows: Sampling  
252 locations, original data photos, and spot trait data: Dryad DOI:  
253 <https://doi.org/10.5061/dryad.6514r>.

## 254 **Results**

255 We were able to extract patterns and quantify 11 spot traits using ImageJ, and found  
256 measurements were highly reliable with low variation in measurements from different photos  
257 of the same individual (**Table 1**). From our 31 mother-calf pairs, we found two spot traits,  
258 circularity and solidity (tortuousness) (**Figure 2**) had significant PO slope coefficients  
259 between calves and their mothers indicating similarity (**Table 1**). Neither of the first two  
260 dimensions from the PCA (see below) had significant PO regression slopes.

261 The first dimension from the PCA (from 258 calves, including the 31 calves used to  
262 estimate heritability) was composed primarily of spot size-related traits (perimeter, maximum

263 caliper, area, and number) such that increasing dimension 1 meant increasing spot size.  
264 Dimension 1 explained 40.5% of the variance in the data (**Figure 3**). The second dimension  
265 was composed primarily of spot shape traits (aspect ratio, roundness, solidity, and circularity)  
266 such that increasing dimension 2 meant increasing roundness and circularity while decreasing  
267 dimension 2 meant more tortuous edges and irregular shapes. Dimension 2 explained 24.0%  
268 of the variation in the data (**Figure 3**).

269 Gap statistics indicated 4 phenotypic groups was the optimal number of clusters for k-  
270 means clustering, but groups 1 and 2 had a large amount of overlap in PCA variable space  
271 (**Figure 4**), so we also defined 3 phenotypic groups by lumping the two overlapping groups.  
272 Group 1 had medium-sized circular spots, group 2 had small-sized circular and irregular  
273 spots, group 3 had medium-sized irregular spots, and group 4 had large circular and irregular  
274 spots (**Figures 3 & 4**). Our survival analysis of 258 calves divided into 4 phenotypic groups  
275 based on their spot traits indicated that the null model was top-ranked, but  $AIC_c$  weights  
276 showed there was some evidence for survival variation among the 4 phenotypic groups  
277 (**Table 2**). The 3 phenotypic group model found significant differences in survival according  
278 to group (**Table 2**, beta coefficient for lumped groups 1 and 2 = -0.717, 85% CI = -1.235 to -  
279 0.199). Model-averaged seasonal apparent survival estimates indicated differences in survival  
280 existed among phenotypic groups during the first seasons of life, but those differences were  
281 greatly reduced in ages 1 and 2 years old (**Figure 5**).

282 We found two specific spot traits significantly affected survival during the first season  
283 of life (number of spots and aspect ratio;  $\beta_{\text{number of spots}} = -0.031$ , 85% CI = -0.052 to -  
284 0.009;  $\beta_{\text{aspect ratio}} = -0.466$ , 85% CI = -0.827 to -0.105). Both number of spots and aspect  
285 ratio were negatively correlated with survival during the first season of life (**Figure 6**). No  
286 other trait during any age period significantly affected juvenile survival (all beta coefficient  
287 85% CIs included zero), but model selection uncertainty was high (**Table 3**).

288 **Discussion**

289 We were able to objectively and reliably quantify coat pattern traits of wild giraffes using  
290 image analysis software. We demonstrated that some giraffe coat pattern traits of spot shape  
291 appeared to be heritable from mother to calf, and that coat pattern phenotypes defined by spot  
292 size and shape differed in fitness as measured by neonatal survival. Individual covariates of  
293 spot size and shape significantly affected survival during the first 4 months of life. These  
294 results support the hypothesis that giraffe spot patterns are heritable (Dagg, 1968), and affect  
295 neonatal calf survival (Langman, 1977; Mitchell & Skinner, 2003). The fact that spot patterns  
296 affected survival could be related to camouflage, but could also reflect an individual quality  
297 effect, maternal investment, or some other environmental effect. Our methods and results add  
298 to the toolbox for objective quantification of complex mammalian coat pattern traits, and  
299 should be useful for taxonomic or phenotypic classifications based on photographic coat  
300 pattern data.

301 Our analyses highlighted a few aspects of giraffe spots that were most likely to be  
302 heritable and which seem to have the greatest adaptive significance. Circularity and solidity,  
303 both descriptors of spot shape, showed the highest mother-offspring similarity. Circularity  
304 describes how close the spot is to a perfect circle, and is positively correlated with the trait of  
305 roundness and negatively correlated with aspect ratio. Solidity describes how smooth and  
306 entire the spot edges are versus tortuous, ruffled, lobed, or incised and is positively correlated  
307 with the trait of perimeter. We did not document significant similarity of any size-related spot  
308 traits (number of spots, area, perimeter, and maximum caliper), but the first dimension of the  
309 PCA was largely composed of size-related traits. These characteristics could form the basis  
310 for quantifying spot patterns of giraffes across Africa, and gives field workers studying any  
311 animal with complex color patterns a new quantitative lexicon for describing spots. However,  
312 our mode shade measurement was a crude metric, and color is greatly affected by lighting

313 conditions, so we suggest standardization of photographic methods to control for lighting if  
314 color is to be analyzed in future studies.

315 We found that both size and shape of spots was relevant to fitness measured as  
316 juvenile survival. We observed the highest calf survival in the phenotypic group generally  
317 described as large spots that were either circular or irregular. Lowest survival was in the  
318 preprint doi with small and medium-sized circular spots, and small irregular spots. Both the  
319 survival by phenotype analysis and the individual covariate survival analysis found that larger  
320 spots and irregularly shaped spots were correlated with increased survival. It seems likely that  
321 these traits enhance the background-matching of giraffe calves in the vegetation of our study  
322 area (Ruxton *et al.*, 2004; Merilaita *et al.*, 2017). However, covariation in spot patterns and  
323 survival could also reflect an individual quality effect, maternal investment, or some other  
324 environmental effect. The relationships among giraffe spot traits and their effects on fitness  
325 are clearly complex, and require additional investigations into adaptive function and genetic  
326 architecture.

327 Whether or not spot traits affect juvenile survival via anti-predation camouflage, spot  
328 traits may serve other adaptive functions such as thermoregulation (Skinner and Smithers  
329 1990), social communication (VanderWaal *et al.*, 2014), or indicators of individual quality  
330 (Ljetoff *et al.*, 2007), and thus may demonstrate associations with other components of  
331 fitness, such as survivorship in older age classes or fecundity. Individual recognition, kin  
332 recognition, and inbreeding avoidance also could play a role in the evolution of spot patterns  
333 in giraffes (Beecher, 1982; Tibbetts & Dale, 2007; Sherman *et al.*, 1997). Different aspects of  
334 spot traits may also be nonadaptive and serve no function, or spot patterns could be affected  
335 by pleiotropic selection on a gene that influences multiple traits (Lamoreux *et al.*, 2010).

336 Photogrammetry to remotely measure animal traits has utilized geometric approaches  
337 that estimate trait sizes using laser range finders and known focal lengths (Lyon, 1994; Lee *et*

338 al., 2016a), photographs of the traits together with a predetermined measurement unit (Ireland  
339 et al., 2006; Willis et al., 2013), or lasers to project equidistant points on animals while  
340 they are photographed (Bergeron, 2007). We hope the framework we have described using  
341 ImageJ software to quantify spot characteristics with trait measurements from photographs  
342 will prove useful to future efforts at quantifying animal markings as in animal biometry (Kuhl  
343 & Burghardt, 2013). Trait measurements and cluster analysis such as we performed here  
344 could also be useful to classify subspecies, phenotypes, or other groups based on variation in  
345 markings, which could advance the field of phenomics for organisms with complex skin or  
346 coat patterns (Houle et al., 2010).

## 347 **Conclusions**

348 Masai giraffe spot patterns are particularly diverse among giraffe subspecies (Dagg, 1968),  
349 and there are spot patterns in northern Tanzania that bear strong similarities to other giraffe  
350 subspecies elsewhere in Africa. Two recent genetic analyses of giraffe taxonomy both placed  
351 Masai giraffes as their own species (Brown et al., 2007; Fennessy et al., 2016), but the lack of  
352 quantitative tools to objectively analyze coat patterns for taxonomic classification may  
353 underlie some of the confusion that currently exists in giraffe systematics (Bercovitch et al.,  
354 2017). We expect the application of image analysis to giraffe coat patterns will provide a  
355 new, robust dataset to address taxonomic and evolutionary hypotheses.

356       Patterned coats of mammals are hypothesized to be formed by two distinct processes:  
357 a spatially oriented developmental mechanism that creates a species-specific pattern of skin  
358 cell differentiation and a pigmentation-oriented mechanism that uses information from the  
359 pre-established spatial pattern to regulate the synthesis of melanin (Eizirik et al., 2010). The  
360 giraffe skin has more extensive pigmentation and wider distribution of melanocytes than most  
361 other animals (Dimond & Montagna, 1976). Coat pattern variation may reflect discrete  
362 polymorphisms potentially related to life-history strategies, a continuous signal related to

363 individual quality, or a combination of both. Future work on the genetics of coat patterns will  
364 hopefully shed light upon the mechanisms and consequences of coat pattern variation.

### 365 **Acknowledgements**

366 This research was carried out with permission from the Tanzania Commission for Science  
367 and Technology (COSTECH), Tanzania National Parks (TANAPA), the Tanzania Wildlife  
368 Research Institute (TAWIRI), African Wildlife Foundation, and Manyara Ranch  
369 Conservancy. This paper was improved by comments from two anonymous reviewers and  
370 A.K. Lindholm.

### 371 **References**

- 372 Allen WL, Cuthill IC, Scott-Samuel NE, Baddeley R. 2010. Why the leopard got its spots:  
373 relating pattern development to ecology in felids. *Proceedings of the Royal Society of*  
374 *London B: Biological Sciences* 278:1373–1380
- 375 Allen WL, Higham JP, Allen WL. 2015. Assessing the potential information content of  
376 multicomponent visual signals: a machine learning approach. *Proceedings of the Royal*  
377 *Society of London B: Biological Sciences* 282:20142284
- 378 Arnold TW. 2010. Uninformative parameters and model selection using Akaike's Information  
379 Criterion. *Journal of Wildlife Management*, 74:1175–1178
- 380 Beecher MD. 1982. Signature systems and kin recognition. *American Zoologist* 22:477–490
- 381 Bennett DC, Lamoreux ML. 2003. The color loci of mice—a genetic century. *Pigment Cell*  
382 *Research* 16:333–44
- 383 Bercovitch FB, Berry PS, Dagg A, Deacon F, Doherty JB, Lee DE, Mineur F, Muller Z,  
384 Ogden R, Seymour R, Shorrocks B. 2017. How many species of giraffe are there? *Current*  
385 *Biology* 27:R136–R137
- 386 Bergeron P. 2007. Parallel lasers for remote measurements of morphological traits. *Journal of*  
387 *Wildlife Management* 71:289–292



- 388 Bolger DT, Morrison TA, Vance B, Lee D, Farid H. 2012. A computer-assisted system for  
389 photographic mark-recapture analysis. *Methods in Ecology and Evolution* 3:813–822
- 390 Bowen WW, Dawson WD. 1977. Genetic analysis of coat color pattern variation in oldfield  
391 mice (*Peromyscus polionotus*) of Western Florida. *Journal of Mammalogy* 58:521–530
- 392 Brown DM, Brenneman RA, Koepfli KP, Pollinger JP, Milá B, Georgiadis NJ, Louis EE,  
393 Grether GF, Jacobs DK, Wayne RK. 2007. Extensive population genetic structure in the  
394 giraffe. *BMC Biology* 5:57
- 395 Burnham KP, Anderson DR. 2002. Model selection and multimodel inference: a practical  
396 information-theoretical approach. Springer-Verlag New York, New York
- 397 Caro T. 2005. The Adaptive Significance of Coloration in Mammals. *BioScience* 55:125–136
- 398 Calsbeek R, Bonneaud C, Smith TB. 2008. Differential fitness effects of immunocompetence  
399 and neighbourhood density in alternative female lizard morphs. *Journal of Animal*  
400 *Ecology* 77:103-109
- 401 Choquet R, Lebreton J.-D, Gimenez O, Reboulet A.-M, Pradel R. 2009. U-CARE: Utilities  
402 for performing goodness of fit tests and manipulating CAPTURE-RECAPTURE data.  
403 *Ecography* 32:1071–1074
- 404 Cott HB. 1940. Adaptive coloration in animals. Methuen Publishing, London, United  
405 Kingdom
- 406 Dagg AI. 1968. External features of giraffe. *Mammalia* 32:657–669
- 407 Dagg AI. 2014. Giraffe biology, behavior and conservation. Cambridge University Press  
408 New York, New York
- 409 de Villemereuil P, Gimenez O, Doligez B. 2013. Comparing parent-offspring regression with  
410 frequentist and Bayesian animal models to estimate heritability in wild populations: a  
411 simulation study for Gaussian and binary traits. *Methods in Ecology and Evolution*  
412 4:260–275

- 413 Dimond RL, Montagna W. 1976. The skin of the giraffe. *Anatomical Record* 185:63–75
- 414 Eizirik E, David VA, Buckley-Beason V, Roelke ME, Schäffer AA, Hannah SS, Narfström  
415 K, O'Brien SJ, Menotti-Raymond M. 2010. Defining and mapping mammalian coat  
416 pattern genes: multiple genomic regions implicated in domestic cat stripes and spots.  
417 *Genetics* 184:267–275
- 418 Endler JA. 1978. A predator's view of animal color patterns. *Evolutionary Biology* 11:319–  
419 364([doi:10.1007/978-1-4615-6956-5\\_5](https://doi.org/10.1007/978-1-4615-6956-5_5))
- 420 Endler JA. 1980. Natural selection on color patterns in *Poecilia reticulata*. *Evolution* 34:76-91
- 421 Endler JA. 1983. Natural and sexual selection on color patterns in poeciliid fishes.  
422 *Environmental Biology of Fishes* 9:173–190
- 423 Falconer DS, Mackay TFC. 1996. Introduction to quantitative genetics. 4<sup>th</sup> edition,  
424 Pearson/Prentice Hall, New York, New York
- 425 Fennessy J, Bidon T, Reuss F, Kumar V, Elkan P, Nilsson MA, Vamberger M, Fritz U, Janke  
426 A. 2016. Multi-locus analyses reveal four giraffe species instead of one. *Current Biology*  
427 26:2543–2549
- 428 Foster JB. 1966. The giraffe of Nairobi National Park: home range, sex ratios, the herd, and  
429 food. *African Journal of Ecology* 4:139–148
- 430 Garvie MR, Trenchea C. 2014. A three level finite element approximation of a pattern  
431 formation model in developmental biology. *Numerische Mathematik* 127:397–422
- 432 Hoekstra HE. 2006. Genetics, development and evolution of adaptive pigmentation in  
433 vertebrates. *Heredity* 97:222–234
- 434 Holmberg J, Norman B, Arzoumanian Z. 2009. Estimating population size, structure, and  
435 residency time for whale sharks *Rhincodon typus* through collaborative photo-  
436 identification. *Endangered Species Research* 7:39–53

- 437 Hotelling H. 1933. Analysis of a complex of statistical variables into principal components.  
438 *Journal of Educational Psychology* 25:417–441
- 439 Houle D, Govindaraju DR, Omholt S. 2010. Phenomics: the next challenge. *Nature reviews*  
440 *genetics* 11:855–866
- 441 Ireland D, Garrott RA, Rotella J, Banfield J. 2006. Development and application of a mass-  
442 estimation method for Weddell seals. *Marine Mammal Science* 22:361–378
- 443 Irion U, Singh AP, Nuesslein-Volhard C. 2016. The developmental genetics of vertebrate  
444 color pattern formation: lessons from zebrafish. In *Current topics in developmental*  
445 *biology* (Vol117, pp141–169). Academic Press
- 446 Kaelin CB, Xu X, Hong LZ, David VA, McGowan KA, Schmidt-Küntzel A, Roelke ME,  
447 Pino J, Pontius J, Cooper GM, Manuel H. 2012. Specifying and sustaining pigmentation  
448 patterns in domestic and wild cats. *Science* 337:1536–1541
- 449 Kaufman L, Rousseeuw PJ. 2009. Finding groups in data: an introduction to cluster analysis.  
450 John Wiley & Sons, Hoboken, New Jersey
- 451 Kelsh RN. 2004. Genetics and evolution of pigment patterns in fish. *Pigment Cell Melanoma*  
452 *Research* 17:326–336
- 453 Kendall WL, Pollock KH, Brownie C. 1995. A likelihood based approach to capture–  
454 recapture estimation of demographic parameters under the robust design. *Biometrics*  
455 51:293–308
- 456 Kettlewell HBD. 1955. Selection experiments on industrial malanism in the Lepidoptera.  
457 *Heredity* 9:323–342 (doi:10.1038/hdy.1955.36)
- 458 Klingenberg CP. 2010. Evolution and development of shape: integrating quantitative  
459 approaches. *Nature* 11:623–635

- 460 Kruuk LE, Slate J, Wilson AJ. 2008. New answers for old questions: the evolutionary  
461 quantitative genetics of wild animal populations. *Annual Review of Ecology, Evolution,*  
462 *and Systematics* 39:525–548
- 463 Kühl H.S, Burghardt T. 2013. Animal biometrics: quantifying and detecting phenotypic  
464 appearance. *Trends in Ecology and Evolution* 28:432–441
- 465 Lamoreux ML, Delmas V, Larue L, Bennett D. 2010. The colors of mice: a model genetic  
466 network. John Wiley & Sons, Hoboken, New Jersey
- 467 Lande R, Arnold SJ. 1983. The measurement of selection on correlated characters. *Evolution*  
468 37:1210–1226
- 469 Langman VA. 1977. Cow-calf Relationships in Giraffe (*Giraffa camelopardalis giraffa*).  
470 *Ethology* 43:264–286
- 471 Lee DE, Bolger DT. 2017. Movements and source-sink dynamics of a Masai giraffe  
472 metapopulation. *Population Ecology* 59:157-168
- 473 Lee DE, Bond ML, Kissui BM, Kiwango YA, Bolger DT. 2016a. Spatial variation in giraffe  
474 demography: a test of 2 paradigms. *Journal of Mammalogy* 97:1015–1025
- 475 Lee DE, Kissui BM, Kiwango YA, Bond ML. 2016b. Migratory herds of wildebeests and  
476 zebras indirectly affect calf survival of giraffes. *Ecology and Evolution* 6:8402–  
477 8411doi:10.1002/ece3.2561
- 478 Lee DE, Strauss MKL. 2016. Giraffe demography and population ecology. Reference module  
479 in earth systems and environmental sciences. Elsevier Amsterdam, Netherlands
- 480 Le Poul Y, Whibley A, Chouteau M, Prunier F, Llaurens V, Joron, M. 2014. Evolution of  
481 dominance mechanisms at a butterfly mimicry supergene. *Nature Communications* 5:1–8
- 482 Lorenz K. 1937. Imprinting. *The Auk* 54:245–273
- 483 Ljetoff M, Folstad I, Skarstein F, Yoccoz NG. 2007. Zebra stripes as an amplifier of  
484 individual quality? *Annales Zoologici Fennici* 44:368–376

- 485 Lydekker R. 1904. On the Subspecies of *Giraffa Camelopardalis*. Proceedings of the  
486 Zoological Society of London 74:202–229
- 487 Lynch M, Walsh B. 1998. Genetics and analysis of quantitative traits. Sinauer Sunderland,  
488 Massachusetts
- 489 Lyon BE. 1994. A technique for measuring precocial chicks from photographs. The Condor  
490 86:805–809
- 491 MacQueen J. 1967. Some methods for classification and analysis of multivariate  
492 observations. Pp. 281–297 in: Proceedings of 5th Berkeley Symposium on Mathematical  
493 Statistics and Probability, University of California Press, Berkeley
- 494 Maini PK. 2004. Using mathematical models to help understand biological pattern formation.  
495 Comptes Rendus Biologies 327:225–234
- 496 Merilaita S, Scott-Samuel NE, Cuthill I.C. 2017. How camouflage works. Philosophical  
497 Transactions of the Royal Society B 372:20160341 (doi:10.1098/rstb.2016.0341)
- 498 Mills MG, Patterson LB. 2009. Not just black and white: pigment pattern development and  
499 evolution in vertebrates. Seminars in Cell and Developmental Biology 20:72–81
- 500 Mitchell G, Skinner JD. 2003. On the origin, evolution and phylogeny of giraffes *Giraffa*  
501 *camelopardalis*. Transactions of the Royal Society of South Africa 58:51–73
- 502 Morse H. 1978. Origins of Inbred Mice. Academic, New York
- 503 Murray JD. 1981. On pattern formation mechanisms for lepidopteran wing patterns and  
504 mammalian coat markings. Philosophical Transactions of the Royal Society B: Biological  
505 Sciences 295:473–496
- 506 Orr HA. 2009. Fitness and its role in evolutionary genetics. Nature Reviews Genetics 10:531
- 507 Paterson S, Wilson K, Pemberton JM. 1998. Major histocompatibility complex variation  
508 associated with juvenile survival and parasite resistance in a large unmanaged ungulate

- 509 population (*Ovis aries* L.). Proceedings of the National Academy of Sciences 95:3714–  
510 3719
- 511 Pollock KH. 1982. A capture–recapture design robust to unequal probability of capture.  
512 Journal of Wildlife Management 46:752–757
- 513 Pratt DM, Anderson VH. 1979. Giraffe Cow–Calf Relationships and Social Development of  
514 the Calf in the Serengeti. Ethology 51:233–251
- 515 Protas ME, Patel NH. 2008. Evolution of coloration patterns. Annual Review of Cell and  
516 Developmental Biology 24:425–446
- 517 R Core Development Team. 2017. R: a language and environment for statistical computing.  
518 R Foundation for Statistical Computing, Vienna, Austria
- 519 Roff DA. 1997. Evolutionary Quantitative Genetics. Chapman and Hall, New York
- 520 Roulin A. 2004. The evolution, maintenance and adaptive function of genetic colour  
521 polymorphism in birds. Biological Reviews 79:815–848  
522 (doi:10.1017/s1464793104006487)
- 523 Rosenblum EB, Hoekstra HE, Nachman MW. 2004. Adaptive reptile color variation and the  
524 evolution of the *Mclr* gene. Evolution 58:1794–808
- 525 Russell ES. 1985. A history of mouse genetics. Annual Review of Genetics 19:1–28
- 526 Ruxton GD, Sherratt TN, Speed MP. 2004. Avoiding attack. Oxford University Press,  
527 Oxford, United Kingdom
- 528 San-Jose LM, Roulin A. 2017. Genomics of coloration in natural animal populations.  
529 Philosophical Transactions of the Royal Society B 372:20160337
- 530 Schneider CA, Rasband WS, Eliceiri KW. 2012. NIH Image to ImageJ: 25 years of image  
531 analysis. Nature Methods doi:10.1038/nmeth.2089[C]

- 532 Sherley RB, Burghardt T, Barham PJ, Campbell N, Cuthill I.C. 2010. Spotting the difference:  
533 towards fully-automated population monitoring of African penguins *Spheniscus*  
534 *demersus*. *Endangered Species Research* 11:101-111
- 535 Sherman PW, Reeve HK, Pfennig DW. 1997. Recognition systems. Pp. 69–96 in *Behavioural*  
536 *ecology: an evolutionary approach* (JR Krebs and NB Davies, eds.) Blackwell Scientific  
537 Oxford, United Kingdom
- 538 Skinner JD, Smithers RHN. 1990. *The mammals of the Southern African Sub-region*. 2nd ed,  
539 University of Pretoria, Pretoria, South Africa
- 540 Strauss MK, Kilewo M, Rentsch D, Packer C. 2015. Food supply and poaching limit giraffe  
541 abundance in the Serengeti. *Population Ecology* 57:505–516
- 542 Tang-Martinez Z. 2001. The mechanisms of kin discrimination and the evolution of kin  
543 recognition in vertebrates: a critical re-evaluation. *Behavioural Processes* 53:21–40
- 544 Tibbetts EA, Dale J. 2007. Individual recognition: it is good to be different. *Trends in*  
545 *Ecology and Evolution* 22:529–537
- 546 Tibshirani R, Walther G, Hastie T. 2001. Estimating the number of clusters in a data set via  
547 the gap statistic. *Journal of the Royal Statistical Society: Series B (Statistical*  
548 *Methodology)* 63:411–423
- 549 Van Belleghem SM, Papa R, Ortiz Zuazaga H, Hendrickx F, Jiggins CD, McMillan WO,  
550 Counterman BA. 2018. patternize: An R package for quantifying colour pattern variation.  
551 *Methods in Ecology and Evolution*, 9:390–398
- 552 VanderWaal KL, Wang H, McCowan B, Fushing H, Isbell LA. 2014. Multilevel social  
553 organization and space use in reticulated giraffe (*Giraffa camelopardalis*). *Behavioral*  
554 *Ecology* 25:17–26
- 555 White GC, Burnham KP. 1999. Program MARK: survival estimation from populations of  
556 marked animals. *Bird Study* 46(Supplement):120–138

- 557 Whitehead H. 1990. Computer assisted individual identification of sperm whale flukes.  
558 Reports of the International Whaling Commission, Special Issue 12:71–77
- 559 Willisch CS, Marreros N, Neuhaus P. 2013. Long-distance photogrammetric trait estimation  
560 in free-ranging animals: A new approach. *Mammalian Biology* 78:351–355
- 561 Wilson AJ, Reale D, Clements MN, Morrissey MM, Postma E, Walling CA, Kruuk LE,  
562 Nussey DH. 2010. An ecologist’s guide to the animal model. *Journal of Animal Ecology*  
563 79:13–26
- 564 Wittkopp PJ, Williams BL, Selegue JE, Carroll SB. 2003. *Drosophila* pigmentation  
565 evolution: divergent genotypes underlying convergent phenotypes. *Proceedings of the*  
566 *National Academy of Sciences USA* 100:1808–13
- 567 Wright S. 1917. Color inheritance in mammals –III. The rat. *Journal of Heredity* 8:426–430
- 568
- 569



570 **Figure Captions**

571 **Figure 1 Representative images of spot patterns of mother-calf pairs of Masai giraffes**  
572 **(*Giraffa camelopardalis tippelskirchii*) from the Tarangire ecosystem, Tanzania used**  
573 **in this study.** The blue rectangle shows the area analysed using ImageJ to characterize  
574 spot pattern traits.

575 **Figure 2 Representative spot outlines from Masai giraffes in northern Tanzania and**  
576 **their corresponding circularity and solidity values.** Ranges of spot trait values from  
577 258 calves are given in parentheses.

578 **Figure 3 Contributions of 10 trait measurement variables to the first 2 dimensions of the**  
579 **principal components analysis of giraffe spots.** The first dimension (Dim1) was  
580 composed primarily of spot size-related traits (perimeter, maximum caliper, area, and  
581 number of spots), the second dimension (Dim2) was composed primarily of spot shape  
582 traits (aspect ratio, roundness, solidity, and circularity).

583 **Figure 4 Results from k-means cluster analysis of giraffe spot patterns to define**  
584 **phenotypic groups.** Left is gap statistic for different numbers of groups. Right is 4  
585 clusters mapped in PCA space.

586 **Figure 5 Model-averaged seasonal (4 months) apparent survival estimates for coat**  
587 **pattern phenotypic groups of giraffes defined by k-means clustering of their spot**  
588 **pattern traits.** There was evidence for significant differences in survival among  
589 phenotypic groups during the younger ages, but those differences were greatly reduced as  
590 the animals approached adulthood (age 9 – 11 seasons). Error bars are  $\pm 1$  SE.

591 **Figure 6 Survival of neonatal giraffes during their first 4-months of life was negatively**  
592 **correlated with number of spots (a) and aspect ratio (b).** Number of spots and aspect  
593 ratio are the inversely related to spot size and roundness (the variables used when

Giraffe coat patterns

D. E. Lee *et al.*

594       describing coat pattern phenotypic groups), respectively. Black lines are model estimates,  
595       grey lines are 95% confidence intervals.

596

597

598

599 **Table 1 Summary statistics for mother-offspring regressions of spot traits of Masai giraffes in northern Tanzania.** Mean trait values, SD  
 600 (standard deviation), CV (among-individuals coefficient of variation), Reliability (mean % variation in measurements from different pictures of  
 601 the same individual), PO slope coefficients, F-statistics, and P values are provided. Statistically significant heritable traits are in bold.

602

|                      | Number | Area | Perimeter | Angle | Circularity | Maximum<br>Caliper | Feret<br>Angle | Aspect<br>Ratio | Roundness | Solidity | Mode<br>Shade | PCA 1st<br>Dimension |
|----------------------|--------|------|-----------|-------|-------------|--------------------|----------------|-----------------|-----------|----------|---------------|----------------------|
| Mean                 | 18.9   | 0.04 | 0.99      | 87.96 | 0.51        | 0.29               | 88.2           | 1.69            | 0.63      | 0.84     | 6924050       |                      |
| SD                   | 7.5    | 0.01 | 0.25      | 15.39 | 0.08        | 0.06               | 14.5           | 0.15            | 0.04      | 0.04     | 3930565       |                      |
| CV                   | 0.40   | 0.39 | 0.25      | 0.17  | 0.15        | 0.19               | 0.16           | 0.09            | 0.06      | 0.05     | 0.57          |                      |
| Reliability          | 11     | 11   | 13        | 4     | 9           | 8                  | 7              | 5               | 3         | 2        | 13            |                      |
| PO Slope Coefficient | 0.20   | 0.20 | 0.27      | 0.04  | 0.52        | 0.21               | -0.15          | 0.19            | 0.08      | 0.53     | 0.44          | 0.39                 |
| PO Coefficient SE    | 0.23   | 0.21 | 0.18      | 0.20  | 0.16        | 0.21               | 0.15           | 0.18            | 0.17      | 0.17     | 0.22          | 0.21                 |

| Giraffe coat patterns |      |      |      |      | D. E. Lee <i>et al.</i> |      |      |      |      |        |      |      |
|-----------------------|------|------|------|------|-------------------------|------|------|------|------|--------|------|------|
| F 1,29                | 0.76 | 0.87 | 2.27 | 0.04 | 9.97                    | 1.01 | 0.91 | 1.11 | 0.19 | 9.73   | 4.16 | 3.45 |
| P value               | 0.39 | 0.36 | 0.14 | 0.84 | 0.0037                  | 0.32 | 0.35 | 0.30 | 0.66 | 0.0041 | 0.05 | 0.07 |

---

603

604 **Table 2 Model selection results for giraffe calf survival according to phenotypic groups**  
605 **defined by spot traits.** Model weights indicated some evidence for group effects on survival.  
606 Notation 'A' indicates a linear trend with age. Additive models indicate groups shared a  
607 common slope coefficient, but had different intercepts; multiplicative models indicated  
608 groups had different intercepts and different slopes. Model structure in all cases was {S(A ...)  
609  $g''(A) g'(A) p(t) c(t)$ }. Minimum AICc = 3236.38, W = AICc weight, k = number of  
610 parameters.

611

| Model                  | $\Delta$ AICc | W    | k  |
|------------------------|---------------|------|----|
| A + 3 groups           | 0             | 0.43 | 36 |
| Null (no group effect) | 0.94          | 0.27 | 34 |
| A + 4 groups           | 2.06          | 0.15 | 37 |
| A $\times$ 4 groups    | 3.01          | 0.09 | 40 |
| A $\times$ 3 groups    | 3.91          | 0.06 | 38 |

612

613

614

615

616 **Table 3 Model selection results for giraffe calf survival as a linear or quadratic function**  
617 **of spot trait covariates during the first season (4 months), first year, and first 3 years of**  
618 **life.** Confidence intervals of beta coefficients for two traits excluded zero (number of spots,  
619 and aspect ratio), indicating evidence for significant spot trait effects on calf survival during  
620 the first season of life. Model structure in all cases was  $\{S(A + Covariate) g''(A) g'(A) p(t)$   
621  $c(t)\}$  with covariate structure in survival. Notation 'A' indicates a linear trend with age, 't'  
622 indicates time dependence. Minimum AICc = 3239.87, W = AICc weight, k = number of  
623 parameters. Models comprising the top 50% cumulative W are shown.

624

| Model                                | $\Delta$ AICc | W     | k  |
|--------------------------------------|---------------|-------|----|
| Number of spots, 1st season          | 0             | 0.048 | 33 |
| Aspect ratio, 1st season             | 0.44          | 0.039 | 33 |
| Roundness <sup>2</sup> , 1st 3 years | 0.82          | 0.032 | 34 |
| Angle <sup>2</sup> , 1st season      | 0.87          | 0.031 | 34 |
| Roundness, 1st season                | 0.95          | 0.030 | 33 |
| Solidity, 1st season                 | 1.06          | 0.029 | 33 |
| Area <sup>2</sup> , 1st season       | 1.11          | 0.028 | 34 |
| Circularity, 1st season              | 1.15          | 0.027 | 33 |
| Angle <sup>2</sup> , 1st 3 years     | 1.21          | 0.026 | 34 |
| Null model, no covariate             | 1.22          | 0.026 | 32 |

Giraffe coat patterns

D. E. Lee *et al.*

|                                           |      |       |    |
|-------------------------------------------|------|-------|----|
| Maximum caliper, 1st season               | 1.30 | 0.025 | 33 |
| PCA dimension 1, 1st year                 | 1.63 | 0.021 | 33 |
| Angle, 1st 3 years                        | 1.75 | 0.020 | 33 |
| Solidity <sup>2</sup> , 1st season        | 1.76 | 0.020 | 34 |
| Perimeter, 1st season                     | 1.88 | 0.019 | 33 |
| Feret angle <sup>2</sup> , 1st season     | 1.88 | 0.019 | 34 |
| PCA dimension 2 <sup>2</sup> , 1st year   | 1.90 | 0.019 | 34 |
| Feret angle, 1st season                   | 1.93 | 0.018 | 33 |
| Number of spots <sup>2</sup> , 1st season | 2.06 | 0.017 | 34 |

---

625

626

627

Pair#

Mother

Calf

1

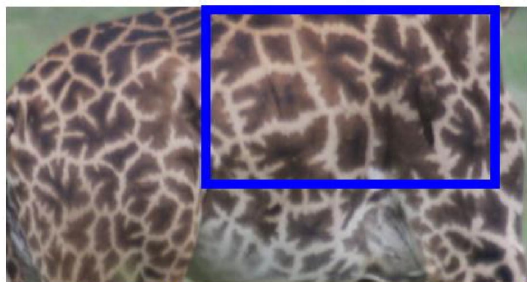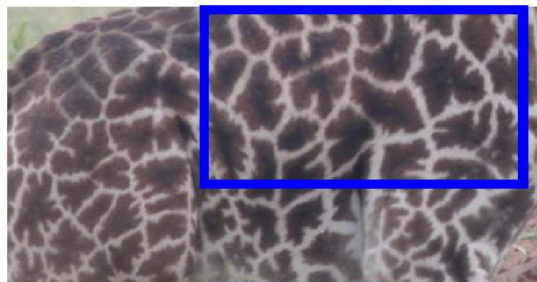

2

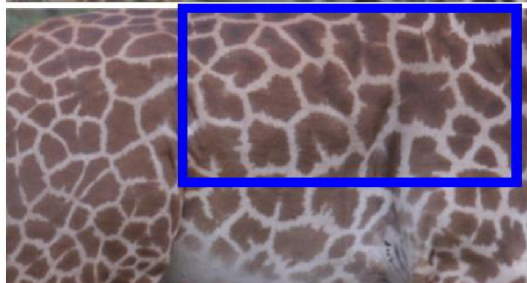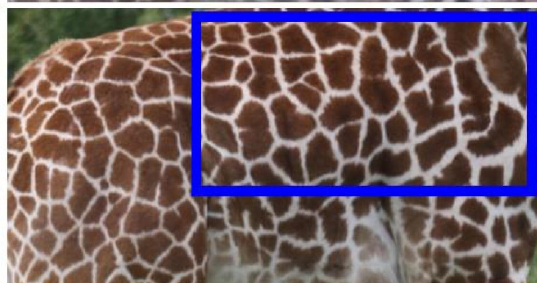

3

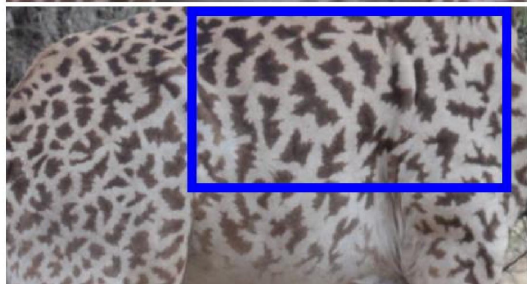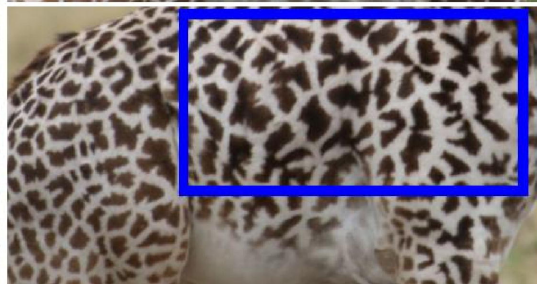

4

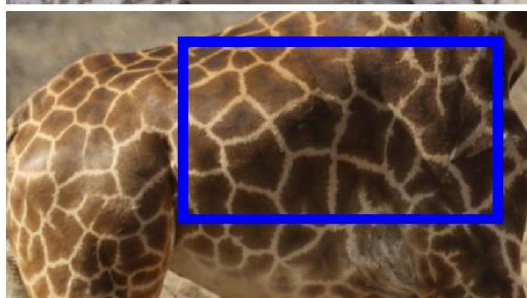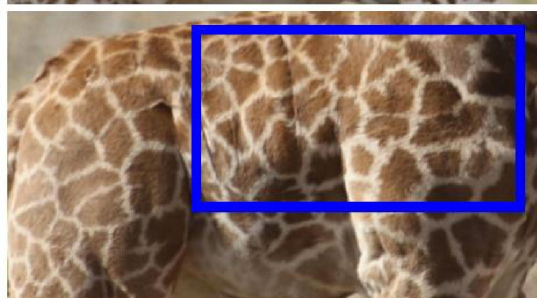

5

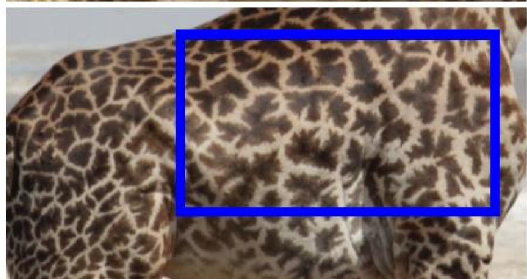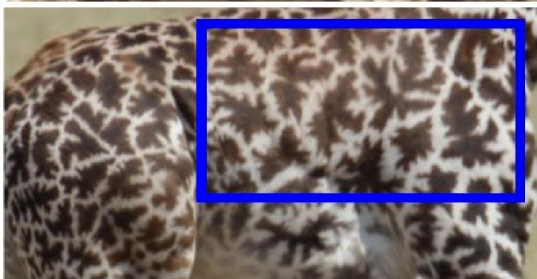



Shape

Circularity  
(0.10—0.94)

Solidity  
(0.52—0.96)

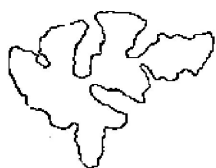

0.15

0.66

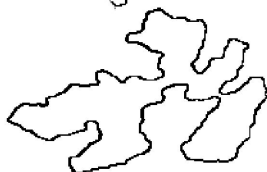

0.13

0.60

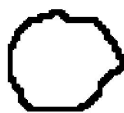

0.88

0.94

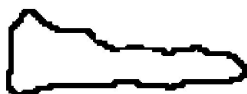

0.37

0.76

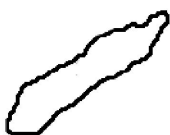

0.40

0.83

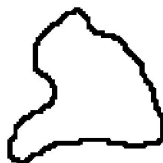

0.57

0.82

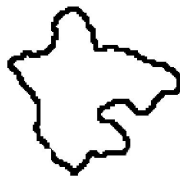

0.44

0.76

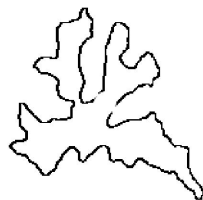

0.12

0.53

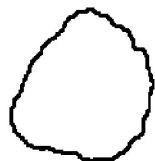

0.83

0.96

# Variables - FCA

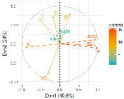

### Optimal number of clusters

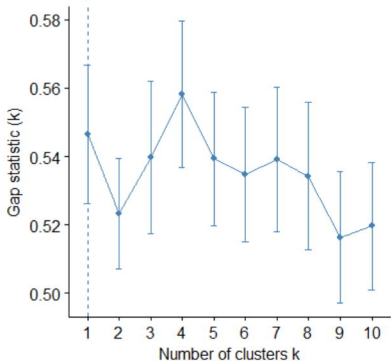

### Partitioning Clustering Plot

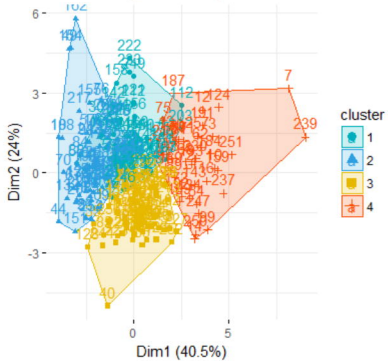

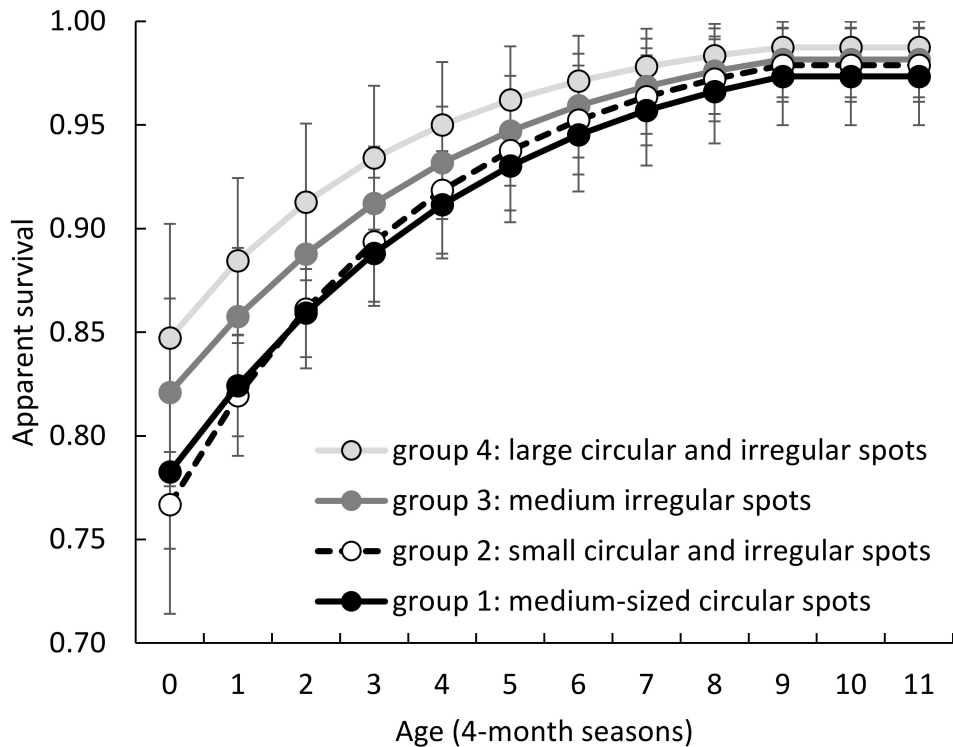

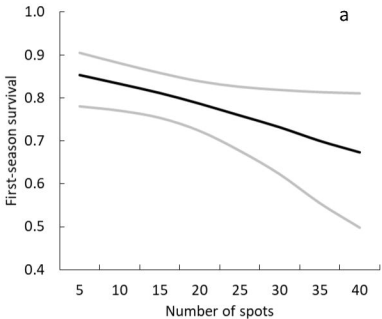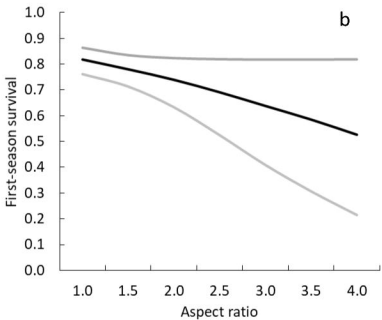

Source: https://www.biorxiv.org/content/10.1101/161281v4.full.pdf
